# Supplementary material for: A Novel Matrine Derivative WM130 Inhibits Activation of Hepatic Stellate Cells and Attenuates Dimethylnitrosamine-Induced Liver Fibrosis in Rats
Source: Hindawi journal article supplement (doi:10.1155/2015/203978), 2015-01-01

### **Supplement Figure Legends**

Supplementary Figure 1: Purity identification of HSC-T6 cells. HSC-T6 cells were seeded at a density of  $1 \times 10^4$  cells/well in 6-well plates. After incubation for 24 h at 37 °C,  $\alpha$ -SMA in cells were examined by immunohistochemical method. All the cells showed positive staining.

Supplementary Figure 2: Toxicity assay of WM130 in WRL-68 cells. normal liver cells WRL-68 were seeded at a density of  $5 \times 10^3$  cells/well in 96-well plates. Different compounds were added in culture at equal concentrations (0.1 mg/ml). After incubation for 24 h, MTT assay were observed. The  $IC_{50}$  of WM130 was 116.4  $\mu$ M.

Supplementary Figure 1

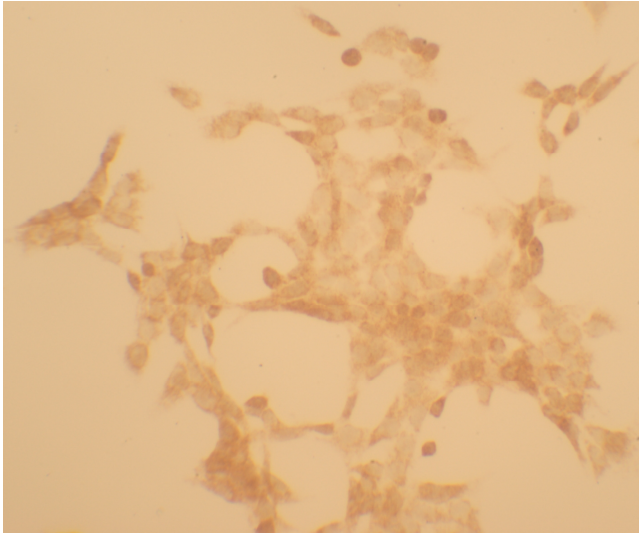

Supplementary Figure 2

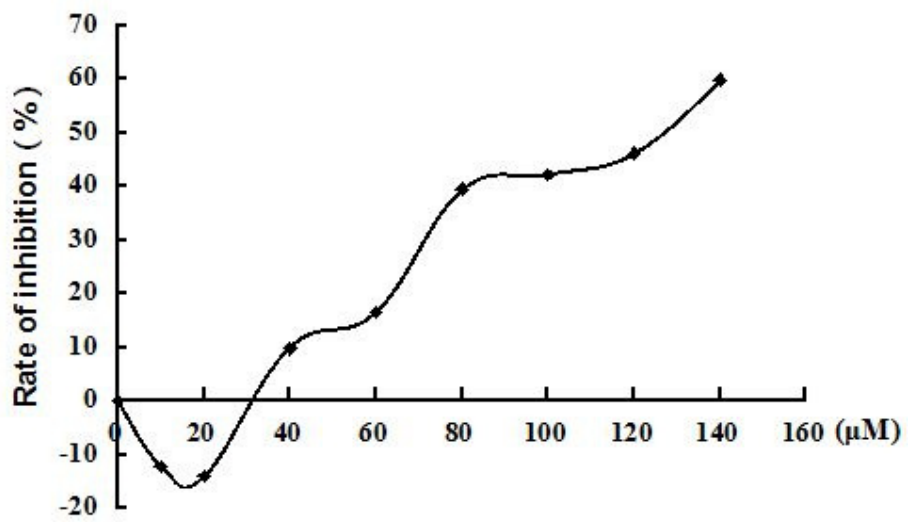

Supplement: f1 [file 203978.f1.pdf]
